# Supplementary material for: Dynamic Prestress in a Globular Protein
Source: PubMed Central journal article supplement (PMC3349725; doi:10.1371/journal.pcbi.1002509), 2012-05-10

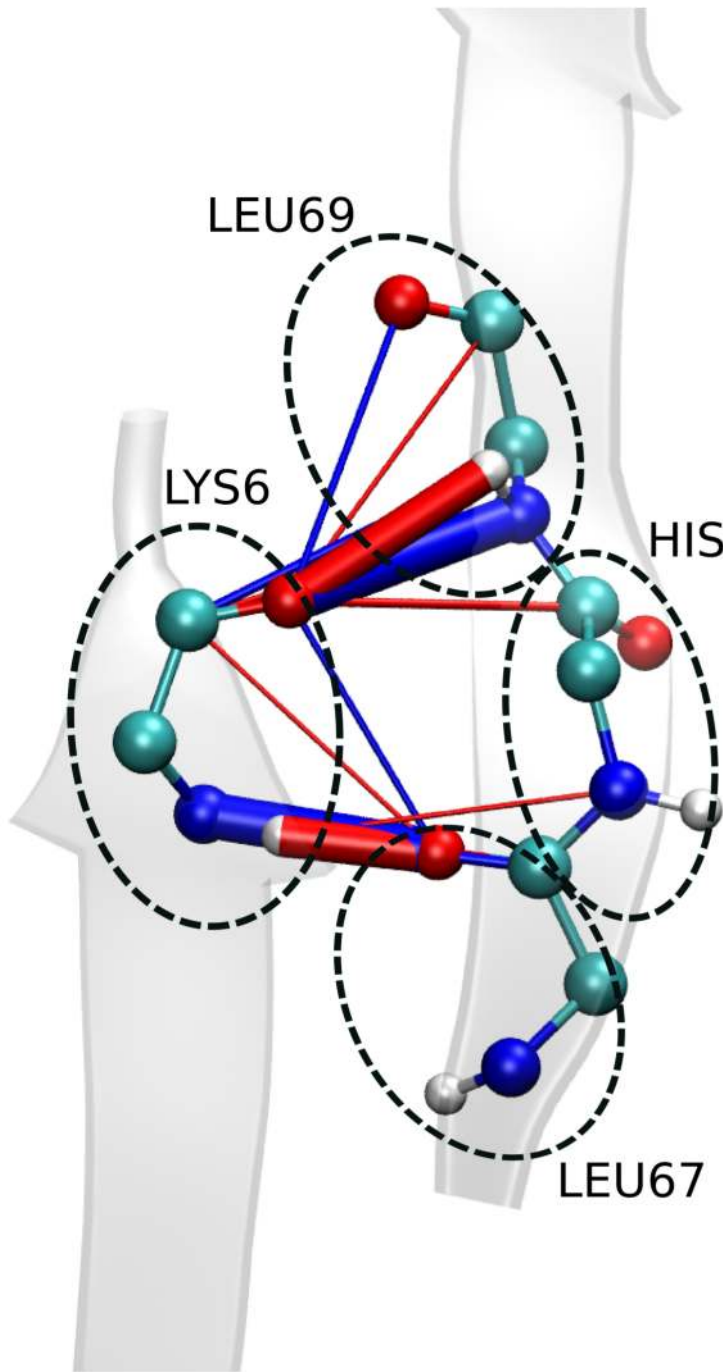

Supplement: pcbi.1002509.s002.pdf [file pcbi.1002509.s002.pdf]
